# Supplementary material
Source: PubMed Central journal article supplement (PMC5685238)
Supplement: 2016_156901-Disclosures_and_Contributions.pdf [file 2016_156901-Disclosures_and_Contributions.pdf]

Haematologica  
HAEMATOL/2016/156901  
Version 5

Chlorambucil plus rituximab as front-line therapy for elderly and/or unfit  
chronic lymphocytic leukemia patients: correlation with  
biologically-based risk stratification

Luca Laurenti, Idanna Innocenti, Francesco Autore, Stefania Ciolli,  
Francesca Romana Mauro, Donato Mannina, Giovanni Del Poeta,  
Giovanni D'Arena, Massimo Massaia, Marta Coscia, Stefano Molica,  
Gabriele Pozzato, Dimitar G Efremov, Barbara Vannata, Roberto  
Marasca, Piero Galieni, Antonio Cuneo, Sonia Orlando, Alfonso  
Piciocchi, Riccardo Boncompagni, Donatella Vincelli, Anna Marina  
Liberati, Filomena Russo, and Robin Foa'

Disclosures: none

Contributions: LL and RF designed the study. II, FA, RP, BV, SC, FRM, DM, GDP, GDA, MM, MC, SM, GP, RM, PG, AC, RB, DV, AML and FR provided clinical data. SO and AP performed data analysis. LL, II, FA, DGE and RF wrote the manuscript. All authors critically reviewed and edited the paper.
